# Supplementary material
Source: ML conference proceedings conference paper supplement (https://proceedings.neurips.cc/paper_files/paper/2016/hash/b20bb95ab626d93fd976af958fbc61ba-Abstract.html)
Supplement: Supplementary file [file b20bb95ab626d93fd976af958fbc61ba-Supplemental.zip]

## 7 Appendix

### 7.1 Properties of self-concordant barriers

This section highlights some properties of self-concordant barriers that will be useful in this work.

The ellipsoid induced by a self-concordant barrier at each point in the interior of the feasible set,  $\{y \in \mathbb{R}^d : \|y\|_x \leq 1\}$ , is called the Dikin ellipsoid. The first result tells us that we can sample around the Dikin ellipsoid without worrying about leaving the feasible region.

**Theorem 3** (Theorem 2.1.1 [Nesterov and Nemirovskii, 1994]). *Let  $\mathcal{K}$  be a closed convex set in  $\mathbb{R}^d$ , and let  $\mathcal{R}$  be a  $\nu$ -self-concordant barrier for  $\mathcal{K}$ . Then for any  $x \in \text{int}(\mathcal{K})$ , we have that  $\{y \in \mathbb{R}^d : \|y - x\|_x < 1\} \subset \text{int}(\mathcal{K})$ .*

The next result, presented in [Dekel et al., 2015], is a variant of John’s ellipsoid theorem for ellipsoids induced by self-concordant barriers. It shows that the Euclidean norm and the norm induced by the barrier are equivalent up to the diameter of the convex set.

**Lemma 10** (Lemma 6 [Dekel et al., 2015]). *Let  $\mathcal{K}$  be a closed convex set in  $\mathbb{R}^d$ , and let  $\mathcal{R}$  be a  $\nu$ -self-concordant barrier for  $\mathcal{K}$ . Then for any  $x \in \mathcal{K}$  and  $y \in \mathbb{R}^d$ , the following inequality holds:  $D^{-1}\|z\|_{x,*} \leq \|z\|_2 \leq D\|z\|_x$ .*

The second result shows that the Hessian of a self-concordant barrier changes slowly within the Dikin ellipsoid of a point.

**Theorem 4** (Theorem 2.1.1 [Nesterov and Nemirovskii, 1994]). *Let  $\mathcal{K}$  be a closed convex set in  $\mathbb{R}^d$ , and let  $\mathcal{R}$  be a  $\nu$ -self-concordant barrier for  $\mathcal{K}$ . Then for any  $x \in \text{int}(\mathcal{K})$  and  $z \in \mathbb{R}^d$  with  $\|y\|_x \leq 1$ , we have that*

$$(1 - \|y\|_x)^2 \nabla^2 \mathcal{R}(x) \preceq \nabla^2 \mathcal{R}(x + y) \preceq (1 - \|y\|_x)^{-2} \nabla^2 \mathcal{R}(x).$$

The next result tells us that outside of an  $\epsilon$  annulus at the boundary of  $\mathcal{K}$ , a self-concordant barrier grows at most logarithmically.

**Proposition 1** (Proposition 2.3.2 [Nesterov and Nemirovskii, 1994]). *Let  $\mathcal{K}$  be a closed convex set in  $\mathbb{R}^d$ , and let  $\mathcal{R}$  be a  $\nu$ -self-concordant barrier for  $\mathcal{K}$ . For any  $\epsilon \in (0, 1]$ , let  $K_{y,\epsilon} = \{y + (1 - \epsilon)(x - y) : x \in \mathcal{K}\}$ . Then for all  $x \in K_{y,\epsilon}$ , the following inequality holds:  $R(x) \leq \nu \log(1/\epsilon)$ .*

### 7.2 Proofs for $\mathcal{C}^{0,1}$ analysis

**Lemma 5** ( $\mathcal{C}^{0,1}$  Structural bound on true losses in terms of smoothed losses). *Let  $(f_t)_{t=1}^T$  be a sequence of loss functions, and assume that  $f_t : \mathcal{K} \rightarrow \mathbb{R}_+$  is  $C$ -bounded and  $L$ -Lipschitz, where  $\mathcal{K} \subset \mathbb{R}^d$ . Denote*

$$\hat{f}_t(x) = \mathbb{E}_{u \sim U(\partial B_1(0))} [f_t(x + \delta A_t u)], \quad \hat{g}_t = \frac{d}{\delta} f_t(y_t) A_t^{-1} u_t, \quad y_t = x_t + \delta A_t u_t$$

*for arbitrary  $A_t$ ,  $\delta$ , and  $u_t$ . Let  $x^* = \arg\min_{x \in \mathcal{K}} \sum_{t=1}^T f_t(x)$ , and let  $x_\epsilon^* \in \arg\min_{y \in \mathcal{K}, \text{dist}(y, \partial \mathcal{K}) > \epsilon} \|y - x^*\|$ . Assume that we play  $y_t$  at every round. Then the following structural estimate holds:*

$$\text{Reg}_T(\mathcal{A}) = \mathbb{E}[\sum_{t=1}^T f_t(y_t) - f_t(x^*)] \leq \epsilon LT + 2L\delta DT + \sum_{t=1}^T \mathbb{E}[\hat{f}_t(x_t) - \hat{f}_t(x_\epsilon^*)].$$

*Proof.* Then using that the losses are Lipschitz, that  $\widehat{f}_t(x) \geq f_t(x)$ , and that we sample around ellipsoids scaled by  $\delta$ ,

$$\begin{aligned}
\text{Reg}_T(\mathcal{A}) &= \mathbb{E}\left[\sum_{t=1}^T f_t(y_t) - f_t(x^*)\right] \\
&= \mathbb{E}\left[\sum_{t=1}^T f_t(y_t) - \widehat{f}_t(y_t) + \widehat{f}_t(y_t) - \widehat{f}_t(x_t) + \widehat{f}_t(x_t) - \widehat{f}_t(x_\epsilon^*) + \widehat{f}_t(x_\epsilon^*) - f_t(x_\epsilon^*) \right. \\
&\quad \left. + f_t(x_\epsilon^*) - f_t(x^*)\right] \\
&\leq \mathbb{E}\left[\sum_{t=1}^T \widehat{f}_t(y_t) - \widehat{f}_t(x_t) + \widehat{f}_t(x_\epsilon^*) - f_t(x_\epsilon^*)\right] + \sum_{t=1}^T \mathbb{E}[\widehat{f}_t(x_t) - \widehat{f}_t(x_\epsilon^*)] + \epsilon LT \\
&\leq 2L\delta DT + \epsilon LT + \sum_{t=1}^T \mathbb{E}[\widehat{f}_t(x_t) - \widehat{f}_t(x_\epsilon^*)].
\end{aligned}$$

□

**Lemma 6** ( $\mathcal{C}^{0,1}$  Structural bound on smoothed losses in terms of averaged losses). *Let  $(f_t)_{t=1}^T$  be a sequence of loss functions, and assume that  $f_t: \mathcal{K} \rightarrow \mathbb{R}_+$  is  $C$ -bounded and  $L$ -Lipschitz, where  $\mathcal{K} \subset \mathbb{R}^d$ . Denote*

$$\widehat{f}_t(x) = \mathbb{E}_{u \sim U(\partial B_1(0))} [f_t(x + \delta A_t u)], \quad \widehat{g}_t = \frac{d}{\delta} f_t(y_t) A_t^{-1} u_t, \quad y_t = x_t + \delta A_t u_t$$

for arbitrary  $A_t$ ,  $\delta$ , and  $u_t$ . Let  $x^* = \operatorname{argmin}_{x \in \mathcal{K}} \sum_{t=1}^T f_t(x)$ , and let  $x_\epsilon^* \in \operatorname{argmin}_{y \in \mathcal{K}, \operatorname{dist}(y, \partial \mathcal{K}) > \epsilon} \|y - x^*\|$ . Furthermore, denote

$$\bar{f}_t(x) = \frac{1}{k+1} \sum_{i=0}^k \widehat{f}_{t-i}(x), \quad \bar{g}_t = \frac{1}{k+1} \sum_{i=0}^k \widehat{g}_{t-i}.$$

Assume that we play  $y_t$  at every round. Then we have the structural estimate:

$$\sum_{t=1}^T \mathbb{E} \left[ \widehat{f}_t(x_t) - \widehat{f}_t(x_\epsilon^*) \right] \leq \frac{Ck}{2} + LT \sup_{t \in [1, T], i \in [0, k \wedge t]} \mathbb{E}[\|x_{t-i} - x_t\|_2] + \sum_{t=1}^T \mathbb{E}[\bar{g}_t^\top (x_t - x_\epsilon^*)].$$

*Proof.* The following decomposition holds:

$$\begin{aligned}
\sum_{t=1}^T \mathbb{E} \left[ \widehat{f}_t(x_t) - \widehat{f}_t(x_\epsilon^*) \right] &= \sum_{t=1}^T \mathbb{E} \left[ \frac{1}{k+1} \sum_{i=0}^k \left( \widehat{f}_t(x_t) - \widehat{f}_{t-i}(x_{t-i}) \right) \right. \\
&\quad \left. + \frac{1}{k+1} \sum_{i=0}^k \left( \widehat{f}_{t-i}(x_{t-i}) - \bar{f}_t(x_\epsilon^*) \right) + \frac{1}{k+1} \left( \sum_{i=0}^k \bar{f}_t(x_\epsilon) - \widehat{f}_t(x_\epsilon^*) \right) \right] \\
&= \sum_{t=1}^T \mathbb{E}[(i) + (ii) + (iii)].
\end{aligned}$$

For the first term (i), we have the estimate

$$\begin{aligned}
\sum_{t=1}^T \frac{1}{k+1} \sum_{i=0}^k \left( \widehat{f}_t(x_t) - \widehat{f}_{t-i}(x_{t-i}) \right) &= \sum_{t=T-k+1}^T \frac{1}{k+1} \sum_{i=0}^k \widehat{f}_t(x_t) - \widehat{f}_{t-i}(x_{t-i}) \\
&= \sum_{t=T-k+1}^T \frac{1}{k+1} (k - [k - (t - (T - k))]) \widehat{f}_t(x_t) \\
&= \sum_{t=T-k+1}^T \frac{1}{k+1} (t - T + k) \widehat{f}_t(x_t) \\
&\quad (\text{if } f \leq C, \text{ then } \widehat{f} \leq C) \\
&\leq \sum_{t=T-k+1}^T \frac{1}{k+1} (t - T + k) C \\
&= \sum_{t=1}^{k-1} \frac{1}{k+1} (t + T - k - T + k) C \\
&= \sum_{t=1}^{k-1} \frac{1}{k+1} t C = \frac{(k-1)k}{2(k+1)} C \leq \frac{k}{2} C.
\end{aligned}$$

For the third term (iii), we can say that

$$\begin{aligned}
\frac{1}{k+1} \left( \sum_{i=0}^k \bar{f}_t(x_\epsilon^*) - \widehat{f}_t(x_\epsilon^*) \right) &= \sum_{t=1}^T \frac{1}{k+1} \sum_{i=0}^k \widehat{f}_{t-i}(x_\epsilon^*) - \widehat{f}_t(x_\epsilon^*) \\
&= \sum_{t=k+1}^T \frac{1}{k+1} \sum_{i=0}^k \widehat{f}_{t-i}(x_\epsilon^*) - \widehat{f}_t(x_\epsilon^*) \\
&\quad + \sum_{t=1}^k \frac{1}{k+1} \sum_{i=0}^k \widehat{f}_{t-i}(x_\epsilon^*) - \widehat{f}_t(x_\epsilon^*),
\end{aligned}$$

where the first term is equal to 0 and the second term is  $\leq 0$  because  $f \geq 0$ . Finally, for the second term (ii), we have that

$$\begin{aligned}
\mathbb{E} \left[ \sum_{t=1}^T \frac{1}{k+1} \sum_{i=0}^k \widehat{f}_{t-i}(x_{t-i}) - \bar{f}_t(x_\epsilon^*) \right] &= \mathbb{E} \left[ \sum_{t=1}^T \frac{1}{k+1} \sum_{i=0}^k \widehat{f}_{t-i}(x_{t-i}) - \widehat{f}_{t-i}(x_\epsilon^*) \right] \\
&\leq \mathbb{E} \left[ \sum_{t=1}^T \frac{1}{k+1} \sum_{i=0}^k \widehat{g}_{t-i}^\top(x_{t-i} - x_\epsilon^*) \right] \\
&= \mathbb{E} \left[ \sum_{t=1}^T \frac{1}{k+1} \sum_{i=0}^k \widehat{g}_{t-i}^\top(x_t - x_\epsilon^*) + \widehat{g}_{t-i}^\top(x_{t-i} - x_t) \right] \\
&= \mathbb{E} \left[ \sum_{t=1}^T \bar{g}_t^\top(x_t - x_\epsilon^*) + \frac{1}{k+1} \sum_{i=0}^k \widehat{g}_{t-i}^\top(x_{t-i} - x_t) \right].
\end{aligned}$$

Next, by the linearity of expectation, we can write

$$\begin{aligned}
& \mathbb{E} \left[ \sum_{t=1}^T \frac{1}{k+1} \sum_{i=0}^k \hat{f}_{t-i}(x_{t-i}) - \bar{f}_t(x_\epsilon^*) \right] \\
&= \sum_{t=1}^T \mathbb{E} [\bar{g}_t^\top (x_t - x_\epsilon^*)] + \sum_{t=1}^T \frac{1}{k+1} \sum_{i=0}^k \mathbb{E} [\hat{g}_{t-i}^\top (x_{t-i} - x_t)] \\
&= \sum_{t=1}^T \mathbb{E} [\bar{g}_t^\top (x_t - x_\epsilon^*)] + \sum_{t=1}^T \frac{1}{k+1} \sum_{i=0}^k \mathbb{E} [\nabla \hat{f}_{t-i}(x_{t-i})^\top (x_{t-i} - x_t)] \\
&\leq \sum_{t=1}^T \mathbb{E} [\bar{g}_t^\top (x_t - x_\epsilon^*)] + \sum_{t=1}^T \frac{1}{k+1} \sum_{i=0}^k \mathbb{E} [\|\nabla \hat{f}_{t-i}(x_{t-i})\|_2 \|x_{t-i} - x_t\|_2] \\
&\leq \sum_{t=1}^T \mathbb{E} [\bar{g}_t^\top (x_t - x_\epsilon^*)] + LT \sup_{t \in [1, T], i \in [0, k \wedge t]} \mathbb{E} [\|x_{t-i} - x_t\|_2]. \quad \square
\end{aligned}$$

**Lemma 7** ( $\mathcal{C}^{0,1}$  Algorithmic bound on the averaged losses). *Let  $(f_t)_{t=1}^T$  be a sequence of loss functions, and assume that  $f_t: \mathcal{K} \rightarrow \mathbb{R}_+$  is  $C$ -bounded and  $L$ -Lipschitz, where  $\mathcal{K} \subset \mathbb{R}^d$ . Let  $x^* = \operatorname{argmin}_{x \in \mathcal{K}} \sum_{t=1}^T f_t(x)$ , and let  $x_\epsilon^* \in \operatorname{argmin}_{y \in \mathcal{K}, \operatorname{dist}(y, \partial \mathcal{K}) > \epsilon} \|y - x^*\|$ . Assume that we play according to the algorithm with  $\eta k \leq \frac{\delta}{12Cd}$ . Then we maintain the following guarantee:*

$$\sum_{t=1}^T \mathbb{E} [\bar{g}_t^\top (x_t - x_\epsilon^*)] \leq \frac{2Cd^2\eta T}{\delta^2(k+1)^2} + \frac{1}{\eta} \mathcal{R}(x_\epsilon^*).$$

*Proof.* The first part of the proof is very similar to the analysis given in [Rakhlin and Sridharan, 2013]. For completeness and ease of presentation, we present the full argument here.

Our algorithm is based on the update rule:

$$x_{t+1} = \operatorname{argmin}_x \eta(\bar{g}_{1:t} + \tilde{g}_{t+1})^\top x + \mathcal{R}(x),$$

where

$$\tilde{g}_{t+1} = \frac{1}{k+1} \sum_{i=0}^{k-1} \hat{g}_{t-i} = \frac{1}{k+1} \sum_{i=0}^k \hat{g}_{t+1-i} - \frac{1}{k+1} \hat{g}_{t+1}.$$

Let  $z_t = \operatorname{argmin}_x \eta(\bar{g}_{1:t})^\top x + \mathcal{R}(x)$ . Then

$$\begin{aligned}
\sum_{t=1}^T \mathbb{E} [\bar{g}_t^\top (x_t - x)] &= \sum_{t=1}^T \bar{g}_t^\top (x_t - z_t) + \bar{g}_t^\top (z_t - x) \\
&= \sum_{t=1}^T (\bar{g}_t - \tilde{g}_t)^\top (x_t - z_t) + \tilde{g}_t^\top (x_t - z_t) + \bar{g}_t^\top (z_t - x)
\end{aligned}$$

Now we want to show that  $\forall x$ ,

$$\sum_{t=1}^T \tilde{g}_t^\top (x_t - z_t) + \bar{g}_t^\top z_t \leq \frac{1}{\eta} \mathcal{R}(x) + \sum_{t=1}^T \bar{g}_t^\top x.$$

For  $T = 1$ ,  $\forall x$ , we need to show that

$$\tilde{g}_1^\top (x_1 - y_1) + \bar{g}_1^\top y_1 \leq \frac{1}{\eta} \mathcal{R}(x) + \bar{g}_1^\top x.$$

But  $\tilde{g}_1 = 0$ , and so the result follows from the definition of  $y_1$ .

Now assume that the result is true for  $T - 1$ :

$$\begin{aligned}
\sum_{t=1}^T \tilde{g}_t^\top (x_t - z_t) + \bar{g}_t^\top z_t &= \sum_{t=1}^{T-1} \tilde{g}_t^\top (x_t - z_t) + \bar{g}_t^\top z_t + \tilde{g}_T^\top (x_T - z_T) + \bar{g}_T^\top y_T \\
&\leq \frac{1}{\eta} \mathcal{R}(x_T) + \sum_{t=1}^{T-1} \bar{g}_t^\top x_T + \tilde{g}_T^\top (x_T - y_T) + \bar{g}_T^\top y_T \\
&\quad \text{(by the induction hypothesis)} \\
&= \frac{1}{\eta} \mathcal{R}(x_T) + \left( \sum_{t=1}^{T-1} \bar{g}_t + \tilde{g}_T \right)^\top x_T - \tilde{g}_T^\top y_T + \bar{g}_T^\top y_T \\
&\leq \frac{1}{\eta} \mathcal{R}(y_T) + \left( \sum_{t=1}^{T-1} \bar{g}_t + \tilde{g}_T \right)^\top y_T - \tilde{g}_T^\top y_T + \bar{g}_T^\top y_T \\
&\quad \text{(by definition of } x_T) \\
&= \frac{1}{\eta} \mathcal{R}(y_T) + \left( \sum_{t=1}^T \bar{g}_t \right)^\top y_T \\
&\leq \frac{1}{\eta} \mathcal{R}(x) + \left( \sum_{t=1}^T \bar{g}_t \right)^\top x \quad \forall x \\
&\quad \text{(by definition of } y_T).
\end{aligned}$$

Thus, we have that

$$\sum_{t=1}^T (\bar{g}_t - \tilde{g}_t)^\top (x_t - z_t) + \tilde{g}_t^\top (x_t - z_t) + \bar{g}_t^\top (z_t - x) \leq \sum_{t=1}^T (\bar{g}_t - \tilde{g}_t)^\top (x_t - z_t) + \frac{1}{\eta} \mathcal{R}(x).$$

Now, we can use duality to apply the bound:

$$\sum_{t=1}^T (\bar{g}_t - \tilde{g}_t)^\top (x_t - z_t) + \frac{1}{\eta} \mathcal{R}(x) \leq \sum_{t=1}^T \|\bar{g}_t - \tilde{g}_t\|_{x_t, *} \|x_t - z_t\|_{x_t} + \frac{1}{\eta} \mathcal{R}(x)$$

and we want to show that

$$\begin{aligned}
x_{t+1} &= \operatorname{argmin}_x (\bar{g}_{1:t} + \tilde{g}_{t+1})^\top x + \frac{1}{\eta} \mathcal{R}(x) \\
y_{t+1} &= \operatorname{argmin}_x \bar{g}_{1:t+1}^\top x + \frac{1}{\eta} \mathcal{R}(x)
\end{aligned}$$

imply that

$$\|x_t - z_t\|_{x_t} \leq 2\eta \|\bar{g}_t - \tilde{g}_t\|_{x_t, *}.$$

Toward this end, we recall the following result from [Nesterov, 2004]:

**Theorem 5** (Theorem 2.2 [Nesterov, 2004]). *Let  $\lambda(x, F) = \|\nabla F(x)\|_{\nabla^2 F(x)^{-1}} = \|\nabla F(x)\|_{x, *}$  be the Newton decrement of  $F$  at  $x$ . Suppose that  $\lambda(x, F) \leq \frac{1}{2}$  and  $F$  is a self-concordant barrier. Then*

$$\|x - \operatorname{argmin} F\|_x \leq 2\lambda(x, F).$$

Using this result, consider  $F_{t+1}(x) = \bar{g}_{1:t+1}^\top x + \frac{1}{\eta} \mathcal{R}(x)$ . Then the theorem implies that if  $\lambda(x_t, F_t) \leq \frac{1}{2}$  (which is true if  $\eta k \leq \frac{\delta}{12Cd}$ ), then

$$\|x_t - z_t\|_{x_t} = \|x_t - \operatorname{argmin} F_t\|_{x_t} \leq 2\lambda(x_t, F_t) = 2\eta \|\bar{g}_t - \tilde{g}_t\|_{x_t, *}.$$

Thus, we have shown that

$$\sum_{t=1}^T \mathbb{E}[\bar{g}_t^\top (x_t - x)] \leq \frac{1}{\eta} \mathcal{R}(x) + \sum_{t=1}^T 2\eta \mathbb{E}[\|\bar{g}_t - \tilde{g}_t\|_{x_t, *}^2]$$

We can also estimate that

$$\mathbb{E}[\|\bar{g}_t - \tilde{g}_t\|_{x_t,*}^2] = \mathbb{E}[\|\frac{1}{k+1} \sum_{i=0}^k \hat{g}_{t-i} - \sum_{i=1}^k \hat{g}_{t-i}\|_{x_t,*}^2] = \mathbb{E}[\|\hat{g}_t\|_{x_t,*}^2 \frac{1}{(k+1)^2}] \leq \frac{Cd^2}{\delta^2(k+1)^2}$$

□

**Lemma 8** ( $\mathcal{C}^{0,1}$  Algorithmic bound on the stability of actions). *Let  $(f_t)_{t=1}^T$  be a sequence of loss functions, and assume that  $f_t: \mathcal{K} \rightarrow \mathbb{R}_+$  is  $C$ -bounded and  $L$ -Lipschitz, where  $\mathcal{K} \subset \mathbb{R}^d$ . Assume that we play according to the algorithm with  $\eta k \leq \frac{\delta}{12Cd}$ . Then we have the following estimate:*

$$\mathbb{E}[\|x_{t-i} - x_t\|_2] \leq 2\eta k D \left( \frac{\sqrt{3}L^{1/2}}{k} + \sqrt{2}DL + \frac{\sqrt{48}Cd}{\sqrt{k}\delta} \right)$$

*Proof.* As a first step, we can write that

$$\mathbb{E}[\|x_{t-i} - x_t\|_2] \leq \sum_{s=t-i}^{t-1} \mathbb{E}[\|x_s - x_{s+1}\|_2].$$

Now, Lemma 10 informs us that we can switch between the local norms and the Euclidean norm while only paying a price of  $D$ . This allows us to say that  $\|x_s - x_{s+1}\|_2 \leq D\|x_s - x_{s+1}\|_{x_s}$ .

Let  $G_{t+1}(x) = \eta(\bar{g}_{1:t} + \tilde{g}_{t+1})^\top x + \mathcal{R}(x)$ . If  $\eta > 0$  is such that  $\lambda(x_t, G_{t+1}) \leq \frac{1}{4}$ , then Theorem 2.2 of Nesterov implies that

$$\|x_s - x_{s+1}\|_{x_s} = \|x_s - \arg\min G_{t+1}\|_{x_s} \leq 2\lambda(x_s, G_{s+1}).$$

Since

$$\nabla G_{t+1}(x_t) = \nabla G_t(x_t) + \eta(\bar{g}_t + \tilde{g}_{t+1} - \tilde{g}_t) = \eta(\bar{g}_t + \tilde{g}_{t+1} - \tilde{g}_t),$$

we can write the Newton decrement as  $\lambda(x_s, G_{s+1}) = \eta\|\bar{g}_s + \tilde{g}_{s+1} - \tilde{g}_s\|_{x_s,*}$ .

By Jensen's inequality, we can write

$$\mathbb{E}[\|\bar{g}_t + \tilde{g}_{t+1} - \tilde{g}_t\|_{x_t,*}] \leq \sqrt{\mathbb{E}[\|\bar{g}_t + \tilde{g}_{t+1} - \tilde{g}_t\|_{x_t,*}^2]}.$$

Expanding out these terms, we can see that

$$\begin{aligned} \bar{g}_t + \tilde{g}_{t+1} - \tilde{g}_t &= \frac{1}{k+1} \sum_{i=0}^k \hat{g}_{t-i} + \frac{1}{k+1} \sum_{i=0}^{k-1} \hat{g}_{t-i} - \frac{1}{k+1} \sum_{i=1}^k \hat{g}_{t-i} \\ &= \frac{1}{k+1} \sum_{i=0}^k \hat{g}_{t-i} + \frac{1}{k+1} (\hat{g}_t - \hat{g}_{t-k}) \end{aligned}$$

which implies that

$$\|\bar{g}_t + \tilde{g}_{t+1} - \tilde{g}_t\|_{x_t,*} \leq \frac{1}{k+1} \left\| \sum_{i=0}^{k-1} \hat{g}_{t-i} \right\|_{x_t,*} + \frac{1}{k+1} \|\hat{g}_t\|_{x_t,*}.$$

Let  $\mathbb{E}_t$  denote the conditional expectation at time  $t$ , where we condition on all the randomization for the player up to time  $t$ . Then by using the fact that  $(\alpha + \beta + \gamma)^2 \leq 3(\alpha^2 + \beta^2 + \gamma^2)$ , we have

$$\begin{aligned} \mathbb{E}[\|\bar{g}_t + \tilde{g}_{t+1} - \tilde{g}_t\|_{x_t,*}^2] &\leq \frac{3}{k^2} \mathbb{E} \left[ \left\| \sum_{i=0}^{k-1} \mathbb{E}_{t-i} [\hat{g}_{t-i}] \right\|_{x_t,*}^2 \right] + \frac{3}{k^2} \mathbb{E} \left[ \left\| \sum_{i=0}^{k-1} \hat{g}_{t-i} - \mathbb{E}_{t-i} [\hat{g}_{t-i}] \right\|_{x_t,*}^2 \right] + \frac{3}{k^2} L \\ &\leq \frac{3}{k^2} L + 2D^2 L^2 + \frac{3}{k^2} \mathbb{E} \left[ \left\| \sum_{i=0}^{k-1} \hat{g}_{t-i} - \mathbb{E}_{t-i} [\hat{g}_{t-i}] \right\|_{x_t,*}^2 \right]. \end{aligned}$$

Denote  $h_{t-i} = \hat{g}_{t-i} - \mathbb{E}_{t-i}[\hat{g}_{t-i}]$ . Then we can write this last term as

$$\frac{3}{k^2} \mathbb{E}[\|\sum_{i=0}^{k-1} \hat{g}_{t-i} - \mathbb{E}_{t-i}[\hat{g}_{t-i}]\|_{x_t,*}^2] = \frac{3}{k^2} \mathbb{E}[\|\sum_{i=0}^{k-1} h_{t-i}\|_{x_t,*}^2].$$

We now want to relate the norm  $\|\cdot\|_{x_t,*}$  to the earliest norm  $\|\cdot\|_{x_{t-k},*}$  in the batch.

To do this, we will show the following two facts:

1.  $\|\bar{g}_t + \tilde{g}_{t+1} - \tilde{g}_t\|_{x_t,*} \leq \frac{2d}{\delta}$
2.  $\forall 0 \leq i \leq k$  such that  $t-i \geq 1$ , we have

$$\frac{1}{2} \|z\|_{x_{t-i},*} \leq \|z\|_{x_t,*} \leq 2 \|z\|_{x_{t-i},*}.$$

Writing out the expressions, we have that

$$\bar{g}_t = \frac{1}{k+1} \sum_{i=0}^k \hat{g}_{t-i}, \quad \tilde{g}_{t+1} = \frac{1}{k+1} \sum_{i=0}^{k-1} \hat{g}_{t-i}, \quad \tilde{g}_t = \frac{1}{k+1} \sum_{i=1}^k \hat{g}_{t-i}.$$

For  $t = 1$ , we have

$$\bar{g}_1 + \tilde{g}_2 - \tilde{g}_1 = \frac{1}{k+1} \hat{g}_1 + \frac{1}{k+1} \hat{g}_1 = \frac{2}{k+1} \hat{g}_1$$

and  $\|\hat{g}_s\|_{x_s,*} \leq \frac{Cd}{\delta} \forall s$ , which together imply that

$$\|\bar{g}_1 + \tilde{g}_2 - \tilde{g}_1\|_{x_1,*} = \frac{2}{k+1} \|\hat{g}_1\|_{x_1,*} \leq \frac{2}{k+1} \frac{Cd}{\delta} \leq \frac{2Cd}{\delta}$$

Let  $t > 1$ . Then

$$\|\bar{g}_t + \tilde{g}_{t+1} - \tilde{g}_t\|_{x_t,*} \leq \frac{1}{k+1} \left( \sum_{i=0}^{k-1} \|\hat{g}_{t-i}\|_{x_t,*} + \|\hat{g}_t\|_{x_t,*} \right).$$

By the induction hypothesis,

$$\|\bar{g}_s + \tilde{g}_{s+1} - \tilde{g}_s\|_{x_s,*} \leq \frac{2Cd}{\delta} \forall s < t.$$

This implies that

$$\eta \|\bar{g}_s + \tilde{g}_{s+1} - \tilde{g}_s\|_{x_s,*} \leq \eta \frac{2Cd}{\delta} \forall s < t.$$

If we take  $12k\eta Cd \leq \delta$ , then

$$\eta \|\bar{g}_s + \tilde{g}_{s+1} - \tilde{g}_s\|_{x_s,*} = \lambda(x_s, G_{s+1}) \leq \frac{1}{4},$$

such that

$$\|x_{s+1} - x_s\|_{x_s} \leq 2\eta \|\bar{g}_s + \tilde{g}_{s+1} - \tilde{g}_s\|_{x_s,*} \leq 4\eta \frac{Cd}{\delta} \leq \frac{1}{3}. \quad (\text{since } 12k\eta Cd \leq \delta)$$

Thus, we have shown that

$$\|x_{s+1} - x_s\|_{x_s} \leq \frac{1}{3} < 1.$$

By Theorem 4, this means that

$$\left(1 - 4\eta \frac{d}{\delta}\right)^2 \nabla^2 \mathcal{R}(x_s)^{-1} \preceq \nabla^2 \mathcal{R}(x_{s+1})^{-1} \preceq \left(1 - 4\eta \frac{d}{\delta}\right)^{-2} \nabla^2 \mathcal{R}(x_s)^{-1},$$

which implies the following relation on the induced norms:  $\forall z$ ,

$$\left(1 - 4\eta \frac{d}{\delta}\right) \|z\|_{x_s,*} \leq \|z\|_{x_{s+1},*} \leq \left(1 - 4\eta \frac{d}{\delta}\right)^{-1} \|z\|_{x_s,*},$$

and recursively,  $\forall s \in [t-k, t]$ ,  $\forall z$ ,

$$\left(1 - 4\eta \frac{d}{\delta}\right)^k \|z\|_{x_s,*} \leq \|z\|_{x_t,*} \leq \left(1 - 4\eta \frac{d}{\delta}\right)^{-k} \|z\|_{x_s,*}.$$

Now, we want to show that  $\left(1 - 4\eta \frac{d}{\delta}\right)^k \geq \frac{1}{2}$ .

Since  $12k\eta Cd \leq \delta$ , we have

$$4\eta \frac{Cd}{\delta} \leq \frac{1}{3} < \frac{1}{2}.$$

Using the fact that  $1 - \beta \geq e^{-2\beta}$  for  $\beta \in [0, \frac{1}{2}]$  implies that

$$\left[1 - \left(4\eta \frac{Cd}{\delta}\right)\right]^k \geq e^{-8k\eta \frac{Cd}{\delta}} \geq e^{-2/3} \geq \frac{1}{2}.$$

Thus, we have that

$$\frac{1}{2} \|z\|_{x_s,*} \leq \|z\|_{x_t,*} \leq 2 \|z\|_{x_s,*},$$

which is (2).

This also further implies that

$$\begin{aligned} \|\bar{g}_t + \tilde{g}_{t+1} - \tilde{g}_t\|_{x_t,*} &\leq \frac{1}{k+1} \sum_{i=0}^{k-1} \|\hat{g}_{t-i}\|_{x_t,*} + \frac{1}{k+1} \|\hat{g}_t\|_{x_t,*} \\ &\leq \frac{2}{k+1} \sum_{i=0}^{k-1} \|\hat{g}_{t-i}\|_{x_{t-i},*} + \frac{1}{k+1} \|\hat{g}_t\|_{x_t,*} \\ &\leq \frac{2}{k+1} k \frac{Cd}{\delta} + \frac{1}{k+1} \frac{Cd}{\delta} \\ &= \frac{1}{k+1} \frac{Cd}{\delta} (2k+1) \\ &\leq \frac{2Cd}{\delta}. \end{aligned}$$

Going back to the original quantity, we can now say that

$$\begin{aligned} \frac{3}{k^2} \mathbb{E}[\|\sum_{i=0}^{k-1} h_{t-i}\|_{x_t,*}^2] &\leq \frac{3}{k^2} 4 \mathbb{E}[\|\sum_{i=0}^{k-1} h_{t-i}\|_{x_{t-k},*}^2] \\ &= \frac{3}{k^2} 4 \sum_{i=0}^{k-1} \mathbb{E}[\|h_{t-i}\|_{x_{t-k},*}^2] \text{ (because } h_{t-i} \text{ is a martingale difference)} \\ &\leq \frac{3}{k^2} 16 \sum_{i=0}^{k-1} \mathbb{E}[\|h_{t-i}\|_{x_{t-i},*}^2] \\ &\leq \frac{3}{k^2} 16 \sum_{i=0}^{k-1} \mathbb{E}[\|\hat{g}_{t-i}\|_{x_{t-i},*}^2] \\ &\leq \frac{3}{k^2} 16 \sum_{i=0}^{k-1} \frac{C^2 d^2}{\delta^2} \\ &= \frac{3}{k} 16 \frac{C^2 d^2}{\delta^2}. \end{aligned}$$

□



### 7.3 Proofs for $\mathcal{C}^{1,1}$ analysis

**Lemma 9** ( $\mathcal{C}^{1,1}$  Structural bound on true losses in terms of smoothed losses). *Let  $(f_t)_{t=1}^T$  be a sequence of loss functions, and assume that  $f_t: \mathcal{K} \rightarrow \mathbb{R}_+$  is  $C$ -bounded,  $L$ -Lipschitz, and  $H$ -smooth, where  $\mathcal{K} \subset \mathbb{R}^d$ . Denote*

$$\hat{f}_t(x) = \mathbb{E}_{u \sim U(\partial B_1(0))} [f_t(x + \delta A_t u)], \quad \hat{g}_t = \frac{d}{\delta} f_t(y_t) A_t^{-1} u_t, \quad y_t = x_t + \delta A_t u_t$$

for arbitrary  $A_t$ ,  $\delta$ , and  $u_t$ . Let  $x^* = \operatorname{argmin}_{x \in \mathcal{K}} \sum_{t=1}^T f_t(x)$ , and let  $x_\epsilon^* \in \operatorname{argmin}_{y \in \mathcal{K}, \operatorname{dist}(y, \partial \mathcal{K}) > \epsilon} \|y - x^*\|$ . Assume that we play  $y_t$  at every round. Then we have the structural estimate:

$$\operatorname{Reg}_T(\mathcal{A}) = \mathbb{E} \left[ \sum_{t=1}^T f_t(y_t) - f_t(x^*) \right] \leq \epsilon LT + 2H\delta^2 D^2 T + \sum_{t=1}^T \mathbb{E} [\hat{f}_t(x_t) - \hat{f}_t(x_\epsilon^*)].$$

*Proof.* Then using the fact that the losses are Lipschitz and that we sample around ellipsoids scaled by  $\delta$ , we have that

$$\begin{aligned} \operatorname{Reg}_T(\mathcal{A}) &= \mathbb{E} \left[ \sum_{t=1}^T f_t(y_t) - f_t(x^*) \right] \\ &= \mathbb{E} \left[ \sum_{t=1}^T f_t(y_t) - \hat{f}_t(y_t) + \hat{f}_t(y_t) - \hat{f}_t(x_t) + \hat{f}_t(x_t) - \hat{f}_t(x_\epsilon^*) + \hat{f}_t(x_\epsilon^*) - f_t(x_\epsilon^*) \right. \\ &\quad \left. + f_t(x_\epsilon^*) - f_t(x^*) \right] \\ &\leq \mathbb{E} \left[ \sum_{t=1}^T \hat{f}_t(y_t) - \hat{f}_t(x_t) + \hat{f}_t(x_\epsilon^*) - f_t(x_\epsilon^*) \right] + \sum_{t=1}^T \mathbb{E} [\hat{f}_t(x_t) - \hat{f}_t(x_\epsilon^*)] + \epsilon LT \\ &\leq 2H\delta^2 D^2 T + \epsilon LT + \sum_{t=1}^T \mathbb{E} [\hat{f}_t(x_t) - \hat{f}_t(x_\epsilon^*)]. \end{aligned}$$

□

**Theorem 2** ( $\mathcal{C}^{1,1}$  Bound). *Let  $\mathcal{K} \subset \mathbb{R}^d$  be a convex set with diameter  $D$  and  $(f_t)_{t=1}^T$  a sequence of loss functions with each  $f_t: \mathcal{K} \rightarrow \mathbb{R}_+$   $C$ -bounded,  $L$ -Lipschitz and  $H$ -smooth. Let  $\mathcal{R}$  be a  $\nu$ -self-concordant barrier for  $\mathcal{K}$ . Then, for  $\eta k \leq \frac{\delta}{12Cd}$ , the regret of OPTIMISTICBCO can be bounded as follows:*

$$\begin{aligned} \operatorname{Reg}_T(\text{OPTIMISTICBCO}) &\leq \epsilon LT + H\delta^2 D^2 T \\ &\quad + (TL + DHT)2\eta k D \left[ \frac{\sqrt{3}L^{1/2}}{k} + \sqrt{2}DL + \frac{\sqrt{48}Cd}{\sqrt{k}\delta} \right] + \frac{1}{\eta} \log(1/\epsilon) + Ck + \eta \frac{d^2 T}{\delta^2(k+1)^2}. \end{aligned}$$

In particular, for  $\eta = T^{-8/13}d^{-5/6}$ ,  $\delta = T^{-5/26}d^{1/3}$ ,  $k = T^{1/13}d^{5/3}$ , the following guarantee holds for the regret of the algorithm:

$$\operatorname{Reg}_T(\text{OPTIMISTICBCO}) = \tilde{\mathcal{O}} \left( T^{8/13} d^{5/3} \right).$$

*Proof.* Putting the pieces together from Lemmas 6, 7, 8, and 9, shows that

$$\begin{aligned} \operatorname{Reg}_T(\mathcal{A}) &\leq \epsilon LT + H\delta^2 D^2 T + \frac{Ck}{2} + \frac{2Cd^2\eta T}{\delta^2(k+1)^2} + \frac{1}{\eta} \mathcal{R}(x_\epsilon) \\ &\quad + LT2\eta D \left[ \sqrt{3}L^{1/2} + \sqrt{2}DLk + \frac{\sqrt{48}Cd\sqrt{k}}{\delta} \right] \end{aligned}$$

Since  $x_\epsilon$  is at least  $\epsilon$  away from the boundary, it follows from [Abernethy and Rakhlin, 2009] that  $\mathcal{R}(x_\epsilon) \leq \nu \log(1/\epsilon)$ .

Now, leaving only the  $T$ ,  $k$ ,  $\eta$ ,  $\delta$ , and  $\epsilon$  terms yields an expression of the form:

$$f(k, \eta, \delta, \epsilon) = \epsilon T + \frac{1}{\eta} \log(1/\epsilon) + \delta^2 T + k + \frac{\eta T d^2}{\delta^2 k^2} + T\eta \left[ 1 + k + \frac{k^{1/2} d}{\delta} \right]$$

Now, if we assume a priori that  $k = \Omega(1)$  as  $T \rightarrow \infty$  and take  $\epsilon = T^{-1000}$  as in the statement, then we only care about the terms

$$\frac{1}{\eta} \log(1/\epsilon) + \delta^2 T + k + \frac{\eta T d^2}{\delta^2 k^2} + T\eta k + T\eta \frac{k^{1/2} d}{\delta}.$$

Plugging in the stated terms for  $\eta$ ,  $k$ , and  $\delta$  yields the result. □
